# Supplementary material
Source: ML conference proceedings conference paper supplement (https://openreview.net/forum?id=CbzCID5lkD)
Supplement: supplementary_material [file attachment]

# SUPPLEMENTARY MATERIALS OF TIGAUSSIAN: DISENTANGLE GAUSSIANS FOR SPATIAL- AWARED TEXT-IMAGE-3D ALIGNMENT

Jiarun Liu<sup>1\*</sup> Qifeng Chen<sup>1\*</sup> Yiru Zhao<sup>1</sup> Minghua Liu<sup>2</sup> Baorui Ma<sup>3</sup> Sheng Yang<sup>1†</sup>

<sup>1</sup>Unmanned Vehicle Dept., Cainiao Inc., Alibaba Group, Hangzhou, China

<sup>2</sup>Hillbot, Sunnyvale, USA

<sup>3</sup>Beijing Academy of Artificial Intelligence, Beijing, China

jiarunliu@zju.edu.cn, {cqf7419, shengyang93fs}@gmail.com

## A IMPLEMENTATION DETAILS

### A.1 DATASET DETAILS

For each dataset (i.e., Objaverse (Deitke et al., 2023), ABO (Collins et al., 2022) and SUN RGBD (Song et al., 2015)), we prepare the 3DGS models following methods by UniGS (Li et al., 2025), and sample 1024 Gaussian primitives for each object except for SUN RGBD dataset. As for the text annotations and of each object, we use InternLM-Xcomposer (Dong et al., 2024) to auto-generate the text prompt. To ensure the fairness of comparison, we follow UniGS (Li et al., 2025) for datasets splitting and evaluation setup. Specifically, we use the same test sets for all dataset and Objaverse-LVIS for evaluation.

### A.2 TRAINING DETAILS

We first train TIGAUSSIAN for 15 epochs on Objaverse dataset (Deitke et al., 2023) with 100k objects and evaluate on Objaverse-LVIS dataset. The batch size is 24 for training and 80 for testing. For ABO (Collins et al., 2022) and SUN RGBD (Song et al., 2015) dataset, we quickly finetune the trained model for another 20 epochs to better fit the dataset.

### A.3 REIMPLEMENTATION DETAILS OF BASELINES

**UniGS.** We inherit the test results of UniGS (Li et al., 2025) from the original UniGS paper. Notice that they **DO NOT** release the pretrained checkpoints, and the re-implemented results are slightly downgraded compared to the public results, thus we strictly follow their reported results for fair comparison. The guidance model is Uni3D-S, which is the same used for TIGAUSSIAN. Overall, the performance of UniGS generally surpasses other baseline methods.

**ULIP-2 and Duoduo CLIP.** We follow the training instruction of ULIP-2 (Xue et al., 2024) and Duoduo CLIP (Lee et al., 2025). As for multi-view images number selected for training, we keep it the same as TIGAUSSIAN, i.e., 6 images for each object. Moreover, we use the sampled dataset of Objaverse provided by UniGS to train the model instead of using ensemble dataset for fair comparison. It is worth noting that the training data of ULIP-2 has increased by 6 times directly, resulting in a sharp increase in training time and memory overhead.

**Others.** We inherit the test results of CLIP<sup>2</sup> (Zeng et al., 2023) and Uni3D (Zhou et al., 2024) from the UniGS paper. As for few-shot linear probing result of ULIP (Xue et al., 2023) shows in the main text, we follow the result reported in Uni3D (Zhou et al., 2024).

---

\*Equal contribution.

†Corresponding author.

## B MORE EXPERIMENTAL RESULTS

### B.1 DETAILED RESULTS OF SCENE RECOGNITION

We report the scene recognition accuracy of 10 typical classes in SUN RGBD dataset in Tab. 1 for detailed comparison with UniGS.

Table 1: Recognition results on SUN RGBD dataset. Notice that the average accuracy is across all 37 categories.

| Methods | Bed          | Bookshelf    | Chair        | Desk         | Sofa         | Table        | Toilet       | Bathtub      | Dresser      | Nightstand   | Average      |
|---------|--------------|--------------|--------------|--------------|--------------|--------------|--------------|--------------|--------------|--------------|--------------|
| UniGS   | 80.57        | 76.49        | 88.65        | 65.45        | 88.61        | 74.23        | <b>93.45</b> | 92.06        | 57.64        | 60.16        | 68.92        |
| Ours    | <b>93.87</b> | <b>79.33</b> | <b>91.62</b> | <b>72.62</b> | <b>90.56</b> | <b>77.50</b> | 92.82        | <b>94.67</b> | <b>67.50</b> | <b>62.15</b> | <b>76.46</b> |

### B.2 COMPREHENSIVE COMPARISONS WITH MORE BASELINE METHODS

We conduct additional baseline comparison on OpenShape (Liu et al., 2023a), TAMM (Zhang et al., 2024), MixCon3D (Gao et al., 2024), Recon (Qi et al., 2023) and ReCon++ (Qi et al., 2024). To ensure fair comparison, we reimplement these baselines by training on Objaverse 100k dataset, and also scaling up our TIGAUSSIAN to train on Objaverse 800k dataset without Objaverse-LVIS.

Notice that since most of the baselines leverage an ensembled point cloud dataset (including Objaverse-LVIS evaluation dataset) for training, which has about 876k instances with 10000 points per object, while the results reported in our paper are conducted on only 100k training instances with 1024 points per object. The comprehensive results shown in Tab. 2 and Tab. 3 reveal the superior performance of our proposed method, demonstrating the effectiveness of 3DGS representations and the proposed tokenization and alignment strategies.

Table 2: Comparison of object classification task on Objaverse-LVIS dataset.

| Methods               | Base Model | Training Dataset | GS Points | Top-1       | Top-3       | Top-5       |
|-----------------------|------------|------------------|-----------|-------------|-------------|-------------|
| <i>Objaverse-LVIS</i> |            |                  |           |             |             |             |
| Recon                 | PointBERT  | Objaverse-100k   | 10000     | 25.1        | 45.6        | 50.1        |
| TAMM                  | PointBERT  |                  | 10000     | 22.7        | 40.1        | 48.5        |
| MixCon3D              | PointBERT  |                  | 10000     | 32.3        | 52.5        | 61.5        |
| ReCon++               | ViT-S      |                  | 10000     | 26.9        | 47.5        | 53.6        |
| ReCon++               | ViT-B      |                  | 10000     | 31.0        | 50.5        | 55.2        |
| Ours-S                | Uni3D-S    |                  | 1024      | 41.8        | 62.7        | 69.1        |
| Ours-S                | Uni3D-S    |                  | 10000     | <b>46.7</b> | <b>68.6</b> | 74.5        |
| Ours-B                | Uni3D-B    |                  | 1024      | 46.6        | 67.5        | <b>75.4</b> |

Table 3: Comparison of object classification task on Objaverse-LVIS dataset with larger training dataset.

| Methods               | Base Model | Training Dataset        | GS Points | Top-1       | Top-3       | Top-5       |
|-----------------------|------------|-------------------------|-----------|-------------|-------------|-------------|
| <i>Objaverse-LVIS</i> |            |                         |           |             |             |             |
| OpenShape             | PointBERT  | Ensembled w/o LVIS      | 10000     | 39.1        | 60.8        | 68.9        |
| TAMM                  | PointBERT  | Ensembled w/o LVIS      | 10000     | 42.0        | 63.6        | 71.7        |
| MixCon3D              | PointBERT  | Ensembled w/o LVIS      | 10000     | 47.5        | 69.6        | 76.2        |
| ReCon++               | ViT-B      | Ensembled w/o LVIS      | 10000     | 49.6        | 70.2        | 78.4        |
| UniGS                 | Uni3D-S    | Objaverse-800k w/o LVIS | 1024      | 48.8        | 69.1        | 76.9        |
| Ours                  | Uni3D-S    | Objaverse-800k w/o LVIS | 1024      | <b>50.1</b> | <b>73.6</b> | <b>79.6</b> |

## C ABLATIONS ON GUIDANCE

Compared to raw point cloud, 3DGS has richer structural priors, since each Gaussian contains position, color, scale, rotation and opacity, which enables explicit modeling of local geometry and view-dependent appearance. As we proposed in the paper, the position and color attribute of 3DGS is similar to point cloud, thus the spatial tokenizer could directly benefit from the pre-trained point cloud encoder (e.g., Uni3D (Zhou et al., 2024) with ViT (Dosovitskiy et al., 2021)). Besides, the pre-trained model is trained on much larger point cloud datasets, thus its generalizability could be inherited and make the training process easier. Based on this design, our proposed 3DGS tokenizer fully utilizes other attributes of GS to better perform multimodal alignment. Furthermore, we believe the choice of 3D representation has long-term implications for generative and downstream tasks. While point clouds are simpler, 3DGS bridges the gap between discrete 3D elements and continuous radiance fields — offering a promising direction for future 3D-aware generation and understanding systems. We add additional experiments on training 3DGS encoder without pretrained Uni3D point cloud model guidance. As shown in Tab. 4, leveraging pretrained model has significant advantages.

Table 4: Performances of different methods on zero-shot classification task. We report the average classification accuracy across all categories.

| Methods               | Top-1        | Top-3        | Top-5        |
|-----------------------|--------------|--------------|--------------|
| <i>Objaverse-LVIS</i> |              |              |              |
| Ours w/o pretrained   | 27.93        | 47.74        | 57.08        |
| Ours                  | <b>41.76</b> | <b>62.68</b> | <b>69.15</b> |

## D ABLATIONS ON MULTI-VIEW DIFFUSION MODULE

We also analysis the impact of using different multi-view diffusion models or ground-truth rendered images. We select 6 multi-view images for Objaverse dataset following several methods: (1) Hunyuan3D-v1-lite (Yang et al., 2024), (2) Hunyuan3D-v1-std, (3) rendered ground-truth images given by Zero-1-to-3 (Liu et al., 2023b). As shown in Tab. 5, the results are slightly different from each other depending on the performance of chosen diffusion model.

Table 5: Performances of our method training on different source of multi-view images on zero-shot classification task. We report the average classification accuracy across all categories.

| Methods                   | Top-1        | Top-3        | Top-5        |
|---------------------------|--------------|--------------|--------------|
| <i>Objaverse-LVIS</i>     |              |              |              |
| Ours w/ Hunyuan3D-v1-lite | 39.98        | 61.13        | 68.42        |
| Ours w/ Hunyuan3D-v1-std  | <b>41.76</b> | <b>62.68</b> | 69.15        |
| Ours w/ GT                | 41.03        | 62.31        | <b>69.78</b> |

## E ABLATIONS ON MULTI-VIEW IMAGE NUMBERS

To estimate the impact of the number of multi-view images involved in TIGAUSIAN, we conduct an additional ablation study on different numbers of multi-view images as shown in Tab. 6. xperimental results have shown that selecting more multi-view images does not necessarily mean better multimodal alignment. We hypothesize that this is due to over-alignment between the image and 3DGS modalities when too many views are used, causing the fused visual features to become overly specific and thus harder to align with the more abstract text representations. In addition, as the number of perspectives increases, the requirement for the authenticity of multiple perspectives will also increase, and the number of model parameters will also multiply. Experimental data shows that selecting 6 multi view images can achieve a balance.

Table 6: Performances of our method training with different numbers of multi-view images.

| # MV Images           | Classification Top-1 | Image Retrieval Top-1 |
|-----------------------|----------------------|-----------------------|
| <i>Objaverse-LVIS</i> |                      |                       |
| 1                     | 35.71                | 40.52                 |
| 3                     | 39.61                | 46.79                 |
| 6                     | <b>41.76</b>         | 52.11                 |
| 12                    | 40.52                | <b>52.37</b>          |

## F RUNTIME AND COST ANALYSIS

We further compare the inference time cost with baseline methods on Objaverse-LVIS dataset. All time tests are conducted on a single A100 GPU. As shown in Tab. 7, our method strike a balance between time cost and accuracy. Notice that our disentangled encoder does not introduce too much additional overhead while achieving high performance surpassing compared to UniGS. Compared to methods based on multi-view representation (i.e., Duoduo CLIP (Lee et al., 2025)), our inference time has a significant advantage. As for multi-view generation part, we take it as the training overhead, as Hunyuan3D-v1-lite takes 800ms to generate 6 views per image. Yet as we’ve discussed in Sec. D, when using ground-truth multi-view images provided by original Zero-1-to-3 dataset, there is no significant training overhead involved.

Regarding the model complexity, the GFLOPs of 3DGS Tokenizer is 88.2M, which takes about 80% of the total FLOPs our model. The image fusion module takes 1M for cross attention only, and 3D-text projector takes 24M for multi-layer transformer. The maximum GPU memory of TIGaussian is 32G during inference, which can be easily performed on a single RTX4090 GPU.

Table 7: Comparisons of inference computational cost on Objaverse-LVIS dataset.

| Methods               | Inference Time (ms) | Top-1 Acc. |
|-----------------------|---------------------|------------|
| <i>Objaverse-LVIS</i> |                     |            |
| Uni3D                 | 97.96               | 36.72      |
| UniGS                 | 185.75              | 37.64      |
| Duoduo CLIP           | 235.79              | 38.05      |
| Ours                  | 192.86              | 41.76      |

## G ABLATIONS ON TEXT CAPTIONS

In the main experiments, we use the InternLM-Xcomposer generated text prompt for text modal alignment. In order to further discuss the impact of text label selections, we conduct additional experiments on text label generated by Cap3D, an advanced text label tools which has been evaluated by human experts. As shown in Tab. 8, the results are slightly different. Shorter text prompts are more likely to have better classification result.

Table 8: Performances of our method training on different source of text prompt on zero-shot classification task. We report the average classification accuracy across all categories.

| Methods               | Top-1        | Top-3        | Top-5        |
|-----------------------|--------------|--------------|--------------|
| <i>Objaverse-LVIS</i> |              |              |              |
| Ours w/ InternLM      | <b>41.76</b> | <b>62.68</b> | <b>69.15</b> |
| Ours w/ Cap3D         | 40.12        | 60.35        | 67.82        |

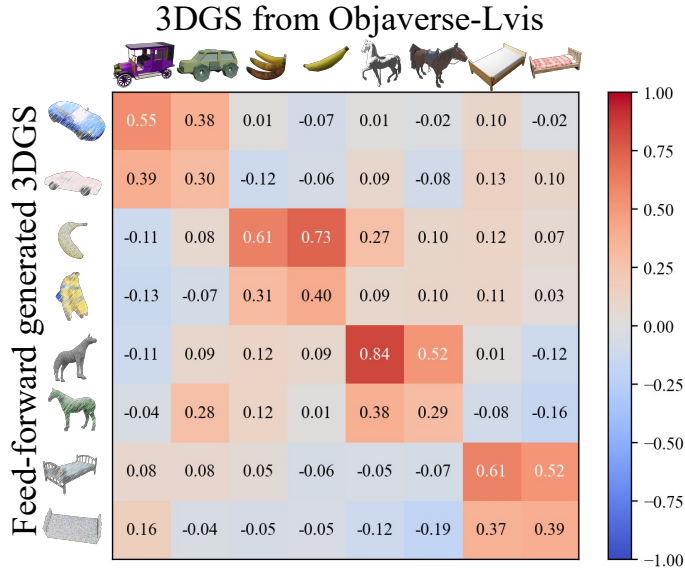

Figure 1: 3DGS feature similarity matrix between Objaverse objects and feed-forward generated 3DGS objects. We select 4 categories from Objaverse-LVIS (i.e., cars, bananas, horses and beds), and compute the cosine similarity of the 3D features of original 3DGS (top) and generated 3DGS (left). The diagonal form of the heatmap proves that our 3D features provide relatively high similarity of objects from the same category, despite their different data sources.

## H ANALYSIS OF GENERALIZATION ABILITY

To demonstrate the generalizability of our proposed method as a 3DGS encoder, we present similarity heatmaps of 3D embeddings from 3DGS objects of various sources. Fig. 1 shows the correlation between original 3DGS objects and the generated 3DGS objects by feed-forward reconstruction method AnySplat (Jiang et al., 2025), which proves that our method is insensitive to the data source of 3DGS and has good generalization ability. Please refer to *supplementary materials* for details.

As for implementation, we leverage the VGGT-based (Wang et al., 2025) feed-forward 3DGS generation method AnySplat (Jiang et al., 2025) to generate several 3DGS objects from the Objaverse-LVIS dataset. Specifically, we randomly select only 3 views of each object and directly get the 3DGS representation results. Fig. 2 shows some visualization results of the rendered image of the generated 3DGS.

## I MODEL SCALING UP

We test the performances results of the proposed method and the baseline method on different scales of training data. As shown in Fig. 3(a), scaling up the training data of TIGAUSIAN can effectively improve the performance on various downstream tasks. Meanwhile, our method surpasses the baseline method and demonstrates effective improvement in training with higher data volumes. In order to further demonstrate the upper limit of our proposed method, we used pretrained point cloud models with different parameter numbers (i.e., Uni3D-S, Uni3D-B and Uni3D-L) to train our encoder, result in Ours-S, Ours-B and Ours-L, respectively. Fig. 3(b) shows Top-1 performances of our method using different backbone.

As for the detailed comparison of scaling up on training dataset and sampled 3DGS points, please refer to Tab. 2 and Tab. 3 in Sec. B.2.

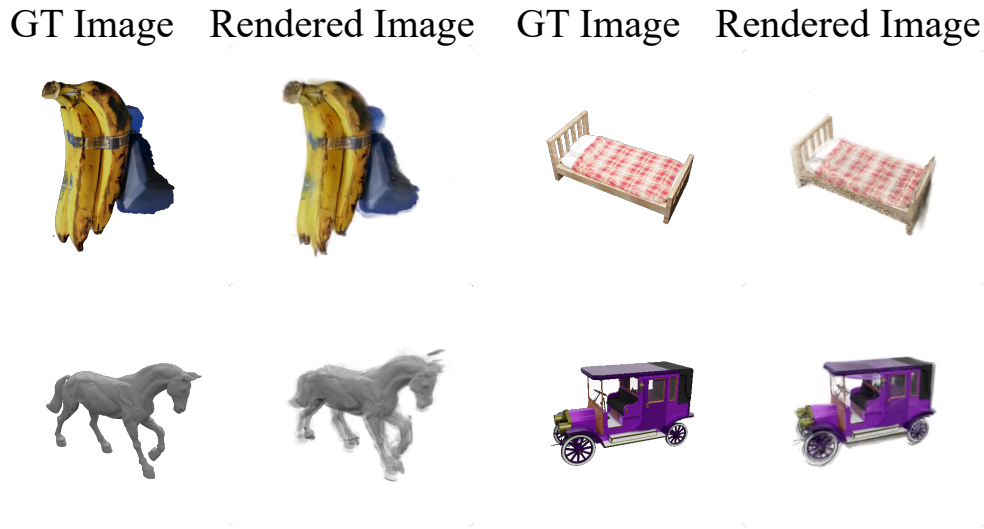

Figure 2: Comparison between the GT images and the rendered images of the 3DGS generated by AnySplat (Jiang et al., 2025).

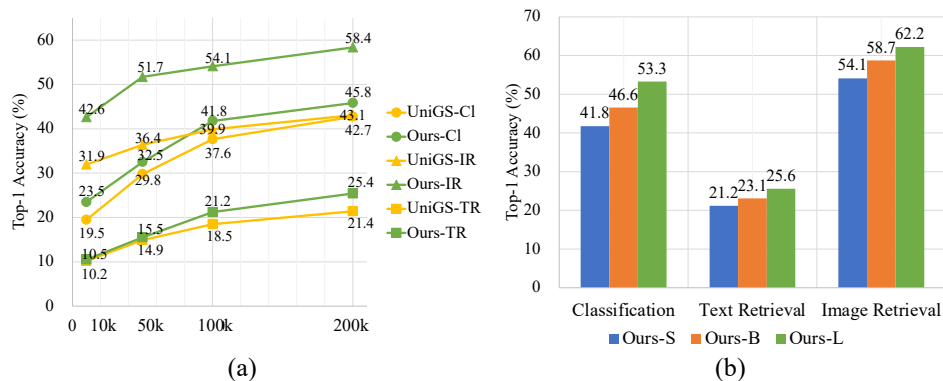

Figure 3: Analysis on scaling up the model. (a) Top-1 accuracy on Objaverse dataset with different scales of training data. We abbreviate classification as **CI**, image retrieval as **IR** and text retrieval as **TR**. (b) Top-1 accuracy on Objaverse dataset with different backbone setups.

## REFERENCES

- Jasmine Collins, Shubham Goel, Kenan Deng, Achleshwar Luthra, Leon Xu, Erhan Gundogdu, Xi Zhang, Tomas F Yago Vicente, Thomas Dideriksen, Himanshu Arora, et al. Abo: Dataset and benchmarks for real-world 3d object understanding. In *IEEE/CVF Conference on Computer Vision and Pattern Recognition*, pp. 21126–21136, 2022.
- Matt Deitke, Dustin Schwenk, Jordi Salvador, Luca Weihs, Oscar Michel, Eli VanderBilt, Ludwig Schmidt, Kiana Ehsani, Aniruddha Kembhavi, and Ali Farhadi. Objaverse: A universe of annotated 3d objects. In *IEEE/CVF Conference on Computer Vision and Pattern Recognition*, pp. 13142–13153, 2023.
- Xiaoyi Dong, Pan Zhang, Yuhang Zang, Yuhang Cao, Bin Wang, Linke Ouyang, Xilin Wei, Songyang Zhang, Haodong Duan, Maosong Cao, et al. Internlm-xcomposer2: Mastering free-form text-image composition and comprehension in vision-language large model. *arXiv preprint arXiv:2401.16420*, 2024.
- Alexey Dosovitskiy, Lucas Beyer, Alexander Kolesnikov, Dirk Weissenborn, Xiaohua Zhai, Thomas Unterthiner, Mostafa Dehghani, Matthias Minderer, Georg Heigold, Sylvain Gelly, et al. An image

- is worth 16x16 words: Transformers for image recognition at scale. In *International Conference on Learning Representations*, pp. 1–21, 2021.
- Yipeng Gao, Zeyu Wang, Wei-Shi Zheng, Cihang Xie, and Yuyin Zhou. Sculpting holistic 3d representation in contrastive language-image-3d pre-training. In *CVPR*, 2024.
- Lihan Jiang, Yucheng Mao, Linning Xu, Tao Lu, Kerui Ren, Yichen Jin, Xudong Xu, Mulin Yu, Jiangmiao Pang, Feng Zhao, et al. Anysplat: Feed-forward 3d gaussian splatting from unconstrained views. *arXiv preprint arXiv:2505.23716*, 2025.
- Han-Hung Lee, Yiming Zhang, and Angel X Chang. Duoduo clip: Efficient 3d understanding with multi-view images. In *International Conference on Learning Representations*, pp. 1–22, 2025.
- Haoyuan Li, Yanpeng Zhou, Tao Tang, Jifei Song, Yihan Zeng, Michael Kampffmeyer, Hang Xu, and Xiaodan Liang. Unigs: Unified language-image-3d pretraining with gaussian splatting. In *International Conference on Learning Representations*, pp. 1–21, 2025.
- Minghua Liu, Ruoxi Shi, Kaiming Kuang, Yinhao Zhu, Xuanlin Li, Shizhong Han, Hong Cai, Fatih Porikli, and Hao Su. Openshape: Scaling up 3d shape representation towards open-world understanding. *Advances in neural information processing systems*, 36:44860–44879, 2023a.
- Ruoshi Liu, Rundi Wu, Basile Van Hoorick, Pavel Tokmakov, Sergey Zakharov, and Carl Vondrick. Zero-1-to-3: Zero-shot one image to 3d object. In *Proceedings of the IEEE/CVF international conference on computer vision*, pp. 9298–9309, 2023b.
- Zekun Qi, Runpei Dong, Guofan Fan, Zheng Ge, Xiangyu Zhang, Kaisheng Ma, and Li Yi. Contrast with reconstruct: Contrastive 3d representation learning guided by generative pretraining. In *International Conference on Machine Learning (ICML)*, 2023.
- Zekun Qi, Runpei Dong, Shaochen Zhang, Haoran Geng, Chunrui Han, Zheng Ge, He Wang, Li Yi, and Kaisheng Ma. Shapellm: Universal 3d object understanding for embodied interaction. *arXiv preprint arXiv:2402.17766*, 2024.
- Shuran Song, Samuel P Lichtenberg, and Jianxiong Xiao. Sun rgb-d: A rgb-d scene understanding benchmark suite. In *IEEE/CVF Conference on Computer Vision and Pattern Recognition*, pp. 567–576, 2015.
- Jianyuan Wang, Minghao Chen, Nikita Karaev, Andrea Vedaldi, Christian Rupprecht, and David Novotny. Vvgt: Visual geometry grounded transformer. In *Proceedings of the Computer Vision and Pattern Recognition Conference*, pp. 5294–5306, 2025.
- Le Xue, Mingfei Gao, Chen Xing, Roberto Martín-Martín, Jiajun Wu, Caiming Xiong, Ran Xu, Juan Carlos Niebles, and Silvio Savarese. Ulip: Learning a unified representation of language, images, and point clouds for 3d understanding. In *IEEE/CVF Conference on Computer Vision and Pattern Recognition*, pp. 1179–1189, 2023.
- Le Xue, Ning Yu, Shu Zhang, Artemis Panagopoulou, Junnan Li, Roberto Martín-Martín, Jiajun Wu, Caiming Xiong, Ran Xu, Juan Carlos Niebles, et al. Ulip-2: Towards scalable multimodal pre-training for 3d understanding. In *IEEE/CVF Conference on Computer Vision and Pattern Recognition*, pp. 27091–27101, 2024.
- Xianghui Yang, Huiwen Shi, Bowen Zhang, Fan Yang, Jiacheng Wang, Hongxu Zhao, Xinhai Liu, Xinzhou Wang, Qingxiang Lin, Jiaao Yu, Lifu Wang, Jing Xu, Zebin He, Zhuo Chen, Sicong Liu, Junta Wu, Yihang Lian, Shaoxiong Yang, Yuhong Liu, Yong Yang, Di Wang, Jie Jiang, and Chunchao Guo. Hunyuan3d 1.0: A unified framework for text-to-3d and image-to-3d generation. *arXiv preprint arXiv:2411.02293*, 2024.
- Yihan Zeng, Chenhan Jiang, Jiageng Mao, Jianhua Han, Chaoqiang Ye, Qingqiu Huang, Dit-Yan Yeung, Zhen Yang, Xiaodan Liang, and Hang Xu. Clip2: Contrastive language-image-point pretraining from real-world point cloud data. In *IEEE/CVF Conference on Computer Vision and Pattern Recognition*, pp. 15244–15253, 2023.

Zhihao Zhang, Shengcao Cao, and Yu-Xiong Wang. Tamm: Triadapter multi-modal learning for 3d shape understanding. In *IEEE/CVF Conference on Computer Vision and Pattern Recognition*, pp. 21413–21423, 2024.

Junsheng Zhou, Jinsheng Wang, Baorui Ma, Yu-Shen Liu, Tiejun Huang, and Xinlong Wang. Uni3d: Exploring unified 3d representation at scale. In *International Conference on Learning Representations*, pp. 1–17, 2024.
